# Supplementary material for: Outcomes of a Multidisciplinary Team in the Management of Patients with Early-Stage Breast Cancer Undergoing Neoadjuvant Chemotherapy at a Community Cancer Center
Source: MDPI journal article supplement (doi:10.3390/curroncol30050366), 2023-05-08
Supplement: s1 [file s1]

# BAYSTATE HEALTH BREAST NETWORK

Pre-OP Chemotherapy Clinical Pathway

Operable Stage IIA, IIB, IIIA\*

| DATE                     | PHYSICIAN VISIT                   | TEST DATE | EVALUATION                                                                        | TREATMENT                                                                                                |
|--------------------------|-----------------------------------|-----------|-----------------------------------------------------------------------------------|----------------------------------------------------------------------------------------------------------|
|                          | BREAST SURGEON CONSULTATION       |           | Core Biopsy                                                                       |                                                                                                          |
|                          |                                   |           | Breast Imaging                                                                    |                                                                                                          |
|                          | MEDICAL ONCOLOGIST CONSULTATION   |           | Blood tests                                                                       |                                                                                                          |
|                          |                                   |           | (Scans if clinically indicated or abnormal blood tests)                           |                                                                                                          |
|                          |                                   |           | Pretreatment Planning<br>Cardiac ECHO<br>Port-a-Cath                              |                                                                                                          |
|                          |                                   |           | FERTILITY PRESERVATION if appropriate                                             | REFERRAL                                                                                                 |
|                          |                                   |           | GENETIC TESTING if appropriate                                                    |                                                                                                          |
|                          | RADIATION ONCOLOGIST CONSULTATION |           | Pre Treatment evaluation and Consider Clinical Trials                             |                                                                                                          |
|                          | PLASTIC SURGEON CONSULTATION      |           | If indicated                                                                      |                                                                                                          |
|                          | MEDICAL ONCOLOGIST                |           | TREATMENT PLAN:<br>Teaching Visit<br>Follow-up visits between Chemotherapy Cycles | CHEMOTHERAPY:<br>Regimen:<br>Number of Weeks:<br><br>TARGETED TREATMENT:<br>Regimen:<br>Number of Weeks: |
| After cycle #6/8 or #4/6 | BREAST SURGEON                    |           | Surgical Planning Visit<br>If indicated, order MRI (after last cycle of chemo)    |                                                                                                          |
| At completion of chemo   | RADIATION ONCOLOGIST              |           |                                                                                   |                                                                                                          |
|                          | BREAST SURGEON                    |           |                                                                                   | SURGERY<br>+/- Port Removal                                                                              |
| 2-3 wks. post-op         | RADIATION ONCOLOGIST              |           | Radiation Planning                                                                | RADIATION                                                                                                |
| 2-3 wks. post-op         | MEDICAL ONCOLOGIST                |           | Discussion of additional treatments<br>If indicated                               | Hormone treatment<br>Targeted treatment<br>Clinical Trials                                               |
