# Supplementary material for: Outcomes of a Multidisciplinary Team in the Management of Patients with Early-Stage Breast Cancer Undergoing Neoadjuvant Chemotherapy at a Community Cancer Center
Source: MDPI journal article supplement (doi:10.3390/curroncol30050366), 2023-05-08
Supplement: s1 [file s1]

**Table S1: Indications for consideration of neoadjuvant systemic therapy:**

|                                                                                                                                                                                                                                                                                                                                                                                                                                                                                                                                               |
|-----------------------------------------------------------------------------------------------------------------------------------------------------------------------------------------------------------------------------------------------------------------------------------------------------------------------------------------------------------------------------------------------------------------------------------------------------------------------------------------------------------------------------------------------|
| Inoperable breast cancer:                                                                                                                                                                                                                                                                                                                                                                                                                                                                                                                     |
| <ul style="list-style-type: none"><li>• Inflammatory breast cancer</li><li>• Locally advanced breast cancer<ul style="list-style-type: none"><li>◦ N2, N3, T4</li><li>◦ Fixed to chest wall or skin</li><li>◦ Edema, Peau d'orange or ulceration</li></ul></li></ul>                                                                                                                                                                                                                                                                          |
| Operable breast cancer:                                                                                                                                                                                                                                                                                                                                                                                                                                                                                                                       |
| <ul style="list-style-type: none"><li>• Convert mastectomy to breast conservation surgery</li><li>• Allow less extensive surgery of the breast or axilla (Sentinel lymph node biopsy vs complete axillary dissection)</li><li>• Allow for less extensive radiation fields</li><li>• Allow time for genetic testing and planning</li><li>• Assess efficacy of treatment, prognosis (TN and HER2 positive) and tailor post-operative therapy</li><li>• Surgery needs to be delayed (pregnancy, recent extensive thrombosis, COVID-19)</li></ul> |
| For operable patients, consider based on the following tumor features:                                                                                                                                                                                                                                                                                                                                                                                                                                                                        |
| <ul style="list-style-type: none"><li>• Clinical T2 or greater with any N</li><li>• Clinical T1N1</li><li>• All TN and HER2 positive except for T1a or T1b</li><li>• Carefully consider in ER positive patients</li></ul>                                                                                                                                                                                                                                                                                                                     |
| Caveats when considering neoadjuvant systemic therapy in operable patients:                                                                                                                                                                                                                                                                                                                                                                                                                                                                   |
| <ul style="list-style-type: none"><li>• May still need mastectomy if large span of ductal carcinoma in-situ</li><li>• Caution if difficult to estimate extent of invasive disease</li><li>• Possibility of disease progression during systemic therapy (&lt;5%)</li><li>• Risk of overtreatment</li><li>• ER positive may not need chemotherapy (Oncotype Dx testing)</li><li>• HER2 positive may be able to receive less intense regimen for e.g., T1N0 may receive weekly paclitaxel and trastuzumab</li></ul>                              |

**Table S2: Management after neoadjuvant chemotherapy**

| Characteristics                                                                                                                                        | Overall                                          | ER+<br>HER2+                                      | ER+<br>HER2-                                 | ER-<br>HER2+                                | ER-<br>HER2-                                 |
|--------------------------------------------------------------------------------------------------------------------------------------------------------|--------------------------------------------------|---------------------------------------------------|----------------------------------------------|---------------------------------------------|----------------------------------------------|
| N (%)                                                                                                                                                  | 94(100.0)                                        | 18 (19.1)                                         | 26 (27.7)                                    | 10 (10.6)                                   | 40 (42.6)                                    |
| Downstaging of tumor – Yes                                                                                                                             | 85 (91.4)                                        | 16 (88.9)                                         | 23 (92.0)                                    | 10 (100.0)                                  | 36 (90.0)                                    |
| Downstaging of axilla – Yes                                                                                                                            | 31 (33.0)                                        | 6 (33.3)                                          | 4 (15.4)                                     | 7 (70.0)                                    | 14 (35.0)                                    |
| Surgery <ul style="list-style-type: none"> <li>• Lumpectomy</li> <li>• Mastectomy</li> <li>• Bilateral Mastectomy</li> </ul>                           | 53 (57.6)<br>39 (41.9)<br>22 (23.7)              | 8 (44.4)<br>10 (55.6)<br>6 (33.3)                 | 14 (56.0)<br>11 (44.0)<br>6 (24.0)           | 5 (50.0)<br>5 (50.0)<br>2 (20.0)            | 27 (67.5)<br>13 (32.5)<br>8 (20.0)           |
| Axillary Management                                                                                                                                    |                                                  |                                                   |                                              |                                             |                                              |
| Sentinel Lymph Node Biopsy                                                                                                                             | 59 (100)                                         | 9 (15.3)                                          | 10 (17.0)                                    | 9 (15.3)                                    | 31 (52.5)                                    |
| Complete Axillary Node Dissection                                                                                                                      | 34 (100)                                         | 9 (26.5)                                          | 15 (44.1)                                    | 1 (2.9)                                     | 9 (26.5)                                     |
| Adjuvant Radiation <ul style="list-style-type: none"> <li>• Yes</li> </ul>                                                                             | 79 (84.0)                                        | 14 (77.8)                                         | 24 (92.3)                                    | 8 (80.0)                                    | 33 (82.5)                                    |
| Areas of Radiation therapy                                                                                                                             |                                                  |                                                   |                                              |                                             |                                              |
| Chest Wall                                                                                                                                             | 27 (28.7)                                        | 7 (38.9)                                          | 10 (38.5)                                    | 3 (30.0)                                    | 7 (17.5)                                     |
| Breast                                                                                                                                                 | 50 (53.2)                                        | 6 (33.3)                                          | 14 (53.8)                                    | 5 (50.0)                                    | 25 (62.5)                                    |
| Internal Mammary                                                                                                                                       | 33 (35.1)                                        | 6 (33.3)                                          | 14 (53.8)                                    | 5 (50.0)                                    | 8 (20.0)                                     |
| Supraclavicular                                                                                                                                        | 47 (49.5)                                        | 10 (55.6)                                         | 17 (65.4)                                    | 5 (50.0)                                    | 15 (37.5)                                    |
| Axilla                                                                                                                                                 | 46 (49.5)                                        | 10 (55.6)                                         | 16 (61.5)                                    | 6 (60.0)                                    | 14 (35.0)                                    |
| Dosage of Radiation <ul style="list-style-type: none"> <li>• Standard fractionation</li> <li>• Hypofractionation</li> </ul>                            | 42 (54.5)<br>33 (42.9)                           | 7 (50.0)<br>7 (50.0)                              | 16 (69.6)<br>6 (26.1)                        | 6 (75.0)<br>2 (25.0)                        | 13 (40.6)<br>18 (56.3)                       |
| Adjuvant systemic therapy <ul style="list-style-type: none"> <li>• Chemotherapy</li> <li>• Hormone therapy</li> <li>• HER2 directed therapy</li> </ul> | 66 (71.0)<br>16 (17.0)<br>39 (41.5)<br>29 (30.9) | 18 (100.0)<br>2 (11.1)<br>14 (77.8)<br>18 (100.0) | 24 (96.0)<br>2 (7.7)<br>24 (92.3)<br>1 (3.8) | 9 (90.0)<br>0 (0.0)<br>1 (10.0)<br>9 (90.0) | 15 (37.5)<br>12 (30.0)<br>0 (0.0)<br>1 (2.5) |

Abbreviations: ER: Estrogen receptor, HER2: Human Epidermal Growth Factor Receptor 2
