# Supplementary material for: Outcomes of a Multidisciplinary Team in the Management of Patients with Early-Stage Breast Cancer Undergoing Neoadjuvant Chemotherapy at a Community Cancer Center
Source: MDPI journal article supplement (doi:10.3390/curroncol30050366), 2023-05-08
Supplement: s1 [file s1]

# BAYSTATE HEALTH BREAST NETWORK

Pre-OP Chemotherapy Clinical Pathway

**Locally Advanced Breast Cancer**

Non-Operable IIIA, IIIB, IIIC

| DATE                        | PHYSICIAN VISIT                 | TEST DATE | EVALUATION                                                                           | TREATMENT                                                                                               |
|-----------------------------|---------------------------------|-----------|--------------------------------------------------------------------------------------|---------------------------------------------------------------------------------------------------------|
|                             | BREAST SURGEON CONSULTATION     |           | Core Biopsy                                                                          |                                                                                                         |
|                             |                                 |           | Breast Imaging                                                                       |                                                                                                         |
|                             | MEDICAL ONCOLOGIST CONSULTATION |           | Pre-Chemo Labs                                                                       |                                                                                                         |
|                             |                                 |           | PET/CT, +/- Bone Scan<br>+/- or CT Chest + Abdomen + pelvis                          |                                                                                                         |
|                             |                                 |           | Pretreatment Planning<br>Cardiac ECHO<br>Port-a-cath                                 |                                                                                                         |
|                             |                                 |           | GENETIC TESTING<br>if appropriate                                                    |                                                                                                         |
|                             |                                 |           | FERTILITY PRESERVATION<br>if appropriate                                             | REFERRAL                                                                                                |
|                             | RADIATION ONCOLOGY CONSULTATION |           |                                                                                      |                                                                                                         |
|                             | MEDICAL ONCOLOGIST              |           | TREATMENT PLAN:<br>Teaching Visit<br>Follow-up visits between<br>Chemotherapy Cycles | CHEMOTHERAPY:<br>Regimen:<br>Number of Weeks:<br><br>TARGETED TREATMENT:<br>Regimen:<br>Number of Weeks |
| After cycle #6/8<br>or #4/6 | BREAST SURGEON                  |           | Surgical Planning Visit                                                              |                                                                                                         |
|                             | BREAST SURGEON                  |           |                                                                                      | SURGERY<br>+/- Port Removal                                                                             |
| 2-3 wks. post-op            | RADIATION ONCOLOGIST            |           | Radiation Planning                                                                   | RADIATION                                                                                               |
| 2-3 wks. post-op            | MEDICAL ONCOLOGIST              |           | Discussion of additional treatments<br>If indicated                                  | Hormone treatment<br>Targeted treatment<br>Clinical Trials                                              |
